# Supplementary material
Source: PubMed Central journal article supplement (PMC2920810)
Supplement: supp_cvq102_cvq102supp.pdf [file supp_cvq102_cvq102supp.pdf]

Supplemental 1: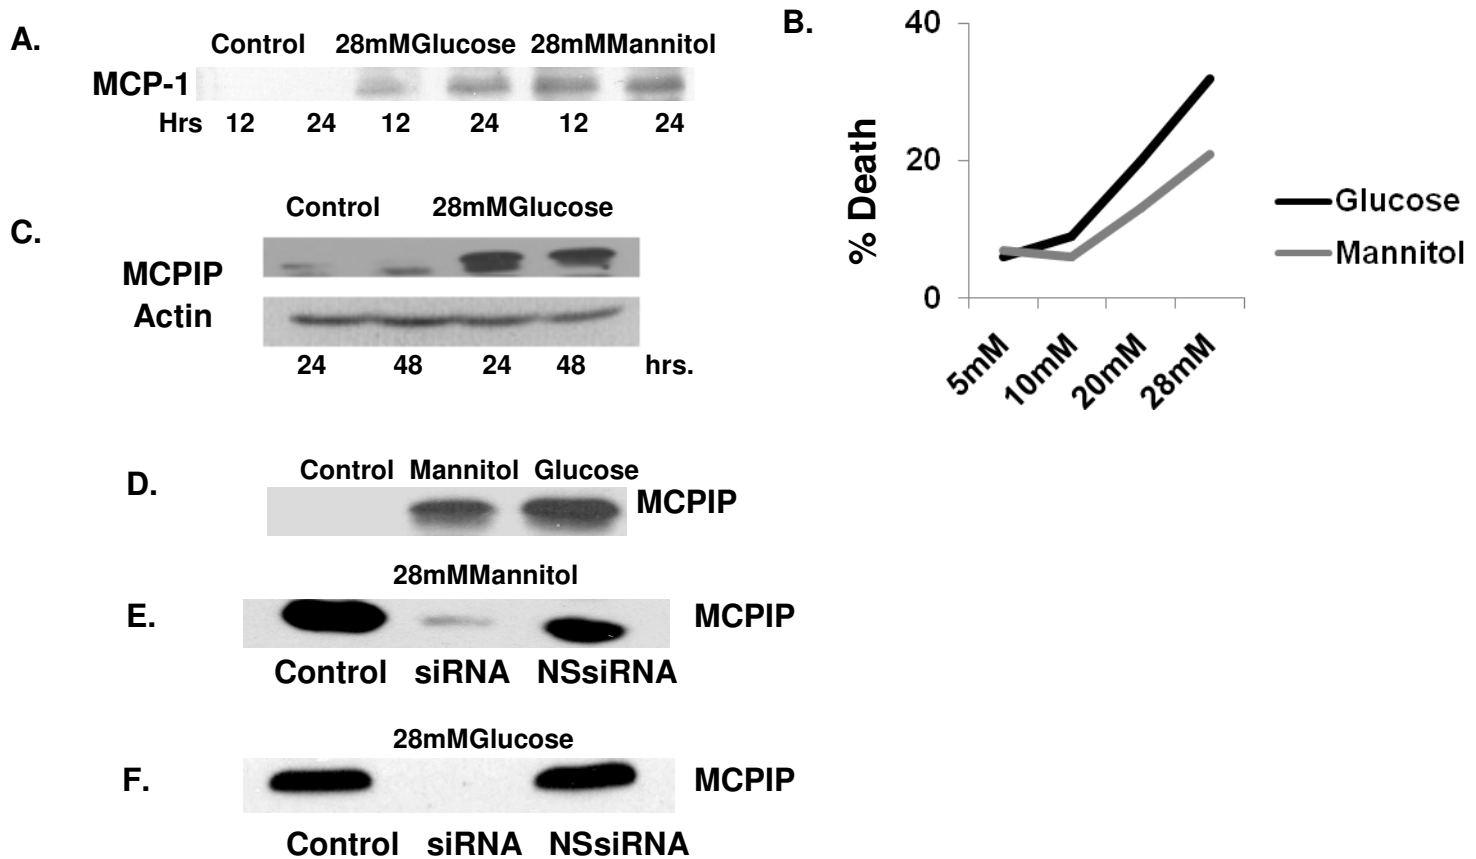

**Supplemental 1:** H9c2 cardiomyoblasts were treated with/without 28mmol/L glucose. (A), At 12 and 24 hrs, cell lysate was collected and analyzed using immunoblot with MCP-1 antibody. Results were quantified against  $\beta$ -actin ( $*=p<0.03$ ). (B), Cardiomyoblasts were treated with 5, 10, 20, and 28mmol/L glucose or mannitol and were evaluated for cell death using trypan blue. (C), Cardiomyoblasts were treated with or without 28mmol/L glucose. Cell lysate was collected at 24 and 48 hrs. and analyzed using immunoblot with MCPIP antibody.  $\beta$ -actin served as a control. (D), Cardiomyoblasts were treated with 28mmol/L glucose or mannitol. Cell lysate was collected at 48 hrs. and analyzed using immunoblot with MCPIP antibody. (E-F)

.Cardiomyoblasts were treated with 28mmol/L glucose or mannitol with/without siRNA specific for MCPiP or with non-specific siRNA. Cell lysate was collected and analyzed using immunoblot with MCPiP antibody at 24hrs.

Supplemental 2:

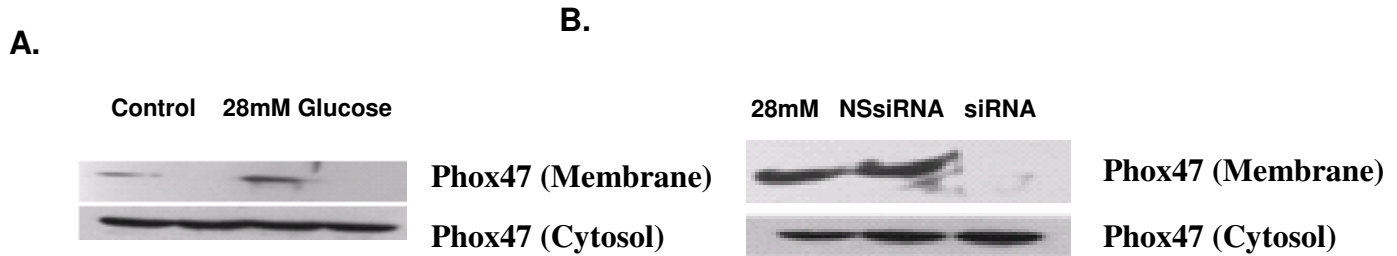

**Supplemental 2:** (A), Cardiomyoblasts were treated with/without 28mmol/L glucose. Cell lysate was collected and the membrane fractions were isolated. Both cytosol and membrane fractions were evaluated using immunoblot with phox47 antibody. (B), Cardiomyoblasts were treated with 28mmol/L glucose with/without siRNA specific for MCPiP or with non-specific siRNA. Cell lysate was collected and the membrane fractions were isolated. Cytosol and membrane fractions were evaluated using immunoblot with phox47 antibody.

Supplemental 3:**B.**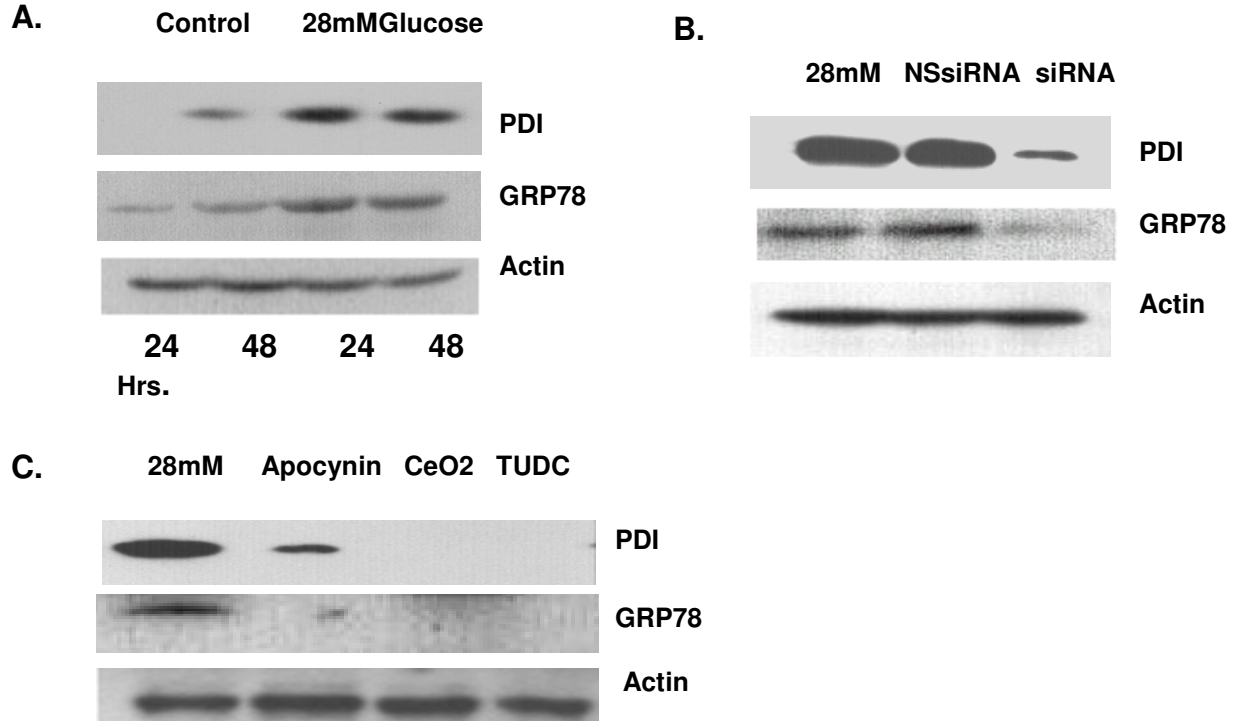

**Supplemental 3:** (A), H9c2 cardiomyoblasts were treated with/without 28mmol/L glucose. Cell lysate was collected and evaluated using immunoblot with antibody for PDI or GRP78. (B), Cardiomyoblasts were treated with 28mmol/L glucose with/without siRNA specific for MCP1P or with non-specific siRNA. Cell lysate was collected from the same samples and evaluated using immunoblot with antibody for PDI or GRP78. (C), Cardiomyoblasts treated with 28mmol/L glucose were treated with/without 20 $\mu$ M Apocynin, 300nM CeO<sub>2</sub> nanoparticles, or 50 $\mu$ M TUDC. At 24 hrs, cell lysate was collected and analyzed using immunoblot with PDI or GRP78 antibody.

Supplemental 4:

A.

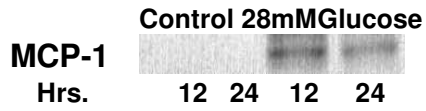

B.

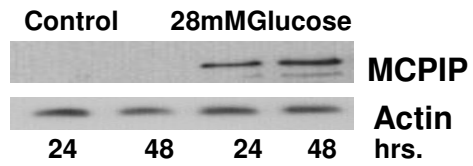

**Supplemental 4:** Isolated cardiomyocytes were treated with/without 28mmol/L glucose. (A), At 12, and 24 hrs. cell lysate was collected and analyzed using immunoblot with MCP-1 antibody. Results normalized to  $\beta$ -actin ( $*=p<0.03$ ). (B), Cell lysate was collected at 24 and 48 hrs. and analyzed using immunoblot with MCPIP antibody.  $\beta$ -actin served as control.

### Cell Culture

DMEM was modified by supplementing with 10% FBS, 1% penicillin and 1% streptomycin.

Cells were treated with or without 50 $\mu$ mol/L 3'methyladenine; 1 $\mu$ mol/L LY294002; 100 $\mu$ mol/L tauroursodeoxycholate (TUDC); 50 $\mu$ mol/L 4-phenylbutiric acid (4-PBA); 50 $\mu$ mol/L L-NAME; 100nmol/L CeO<sub>2</sub>, or 20 $\mu$ mol/L apocynin prior to treatment with 28mol/L glucose.

### RT-PCR

Primers designed for RT-PCR were as follows: MCPIP F-5'-TGTGCCTATCACAGACCAGCACAT-3'; R-5'-TCGGATTCATAGGCCAGCTTCAACA-3'; GRP78 F-5'-AGCCACCGTAACAATCAAGGTCT-3'; R-5'-CGTGTCAATGCGCTCTTTGAGCTT-3'; PDI F-5'-CAGAATGGAAACCGCACAAACCCA-3'; R-5'-GGCCACATCCACCATCA CAAACAA-3'

### Immunoblot Analysis

Protein was extracted using cell lyses buffer (20% glycerol 0.1% TritonX 8% 0.5M EDTA and 1% 1M DTT). Polyclonal antibodies used for immunoblot analysis were as follows: anti-MCPIP (1:2000); anti-BECN1 (Santa Cruz; 1:500); anti-LC3 ; anti-GRP78 (1:2000) ; anti-PDI (1:2000) anti-phox47 (1:1000); and anti-iNOS (Upstate; 1:2000). Immunoblots were quantified as a ratio over  $\beta$ -actin expression.

Statistical Analysis:

The experimental data was analyzed by using SPSS statistical software (SPSS Inc.) under Windows XP. All values are presented as mean  $\pm$  SEM. Results were compared between groups by ANOVA analysis followed by t tests. Differences were considered significant at a p value of  $<0.05$ .
